# Supplementary material
Source: publisher figshare collection journal article supplement (https://asha.figshare.com/articles/dataset/_/21482607)
Supplement: Supplementary file 1 [file 1]

**Supplemental Material S2. Quality appraisal of studies.**

| Study                       | MMAT Quality Appraisal |     |     |     |     |                             |     |     |     |     |                          |     |     |     |     |               |     |     |     |     |
|-----------------------------|------------------------|-----|-----|-----|-----|-----------------------------|-----|-----|-----|-----|--------------------------|-----|-----|-----|-----|---------------|-----|-----|-----|-----|
|                             | Qualitative            |     |     |     |     | Quantitative Non-Randomized |     |     |     |     | Quantitative Descriptive |     |     |     |     | Mixed Methods |     |     |     |     |
|                             | 1.1                    | 1.2 | 1.3 | 1.4 | 1.5 | 3.1                         | 3.2 | 3.3 | 3.4 | 3.5 | 4.1                      | 4.2 | 4.3 | 4.4 | 4.5 | 5.1           | 5.2 | 5.3 | 5.4 | 5.5 |
| An et al. (2017)            |                        |     |     |     |     |                             |     |     |     |     | Y                        | Y   | Y   | Y   | Y   |               |     |     |     |     |
| Andres (2006)               | Y                      | Y   | Y   | Y   | Y   |                             |     |     |     |     |                          |     |     |     |     |               |     |     |     |     |
| Baldassarri et al. (2014)   |                        |     |     |     |     |                             |     |     |     |     | Y                        | Y   | Y   | Y   | Y   |               |     |     |     |     |
| Benkherrat (2019)           | Y                      | Y   | N   | N   | N   |                             |     |     |     |     |                          |     |     |     |     |               |     |     |     |     |
| Bhattacharya & Basu (2009)  |                        |     |     |     |     |                             |     |     |     |     | Y                        | Y   | Y   | Y   | Y   |               |     |     |     |     |
| Bhattacharya & Basu (2010)  |                        |     |     |     |     |                             |     |     |     |     | Y                        | Y   | Y   | Y   | Y   |               |     |     |     |     |
| Blomberg et al. (1986)      | Y                      | Y   | Y   | Y   | Y   |                             |     |     |     |     |                          |     |     |     |     |               |     |     |     |     |
| Choi et al. (2012)          | Y                      | Y   | Y   | Y   | Y   |                             |     |     |     |     |                          |     |     |     |     |               |     |     |     |     |
| Daems et al. (2016)         | Y                      | Y   | Y   | Y   | Y   |                             |     |     |     |     |                          |     |     |     |     |               |     |     |     |     |
| de Oliveira et al. (2016)   | Y                      | Y   | Y   | Y   | Y   |                             |     |     |     |     |                          |     |     |     |     |               |     |     |     |     |
| Deliege (1989)              | Y                      | Y   | N   | N   | N   |                             |     |     |     |     |                          |     |     |     |     |               |     |     |     |     |
| Garcia-Mendez et al. (2019) |                        |     |     |     |     |                             |     |     |     |     | Y                        | Y   | Y   | Y   | Y   |               |     |     |     |     |
| Heikkilä et al. (2019)      | Y                      | Y   | Y   | N   | N   |                             |     |     |     |     |                          |     |     |     |     |               |     |     |     |     |
| Hervás et al. (2020)        |                        |     |     |     |     |                             |     |     |     |     |                          |     |     |     |     | N             | Y   | Y   | Y   | Y   |
| Huertas & Nohama (2014)     | Y                      | Y   | Y   | N   | N   |                             |     |     |     |     |                          |     |     |     |     |               |     |     |     |     |
| Hunnicutt (1984)            | Y                      | Y   | Y   | Y   | Y   |                             |     |     |     |     |                          |     |     |     |     |               |     |     |     |     |
| Iida & Campbell (2003)      |                        |     |     |     |     |                             |     |     |     |     | Y                        | Y   | Y   | Y   | Y   |               |     |     |     |     |
| Johnson et al. (2006)       |                        |     |     |     |     |                             |     |     |     |     |                          |     |     |     |     | N             | Y   | N   | N   | N   |
| Lundälv et al. (2014)       | Y                      | Y   | Y   | Y   | Y   |                             |     |     |     |     |                          |     |     |     |     |               |     |     |     |     |
| Mertl & Frič (2019)         | Y                      | Y   | Y   | Y   | Y   |                             |     |     |     |     |                          |     |     |     |     |               |     |     |     |     |
| Nakazono et al. (2010)      |                        |     |     |     |     | Y                           | Y   | Y   | N   | Y   |                          |     |     |     |     |               |     |     |     |     |
| Vaillant (1998)             | Y                      | Y   | Y   | Y   | Y   |                             |     |     |     |     |                          |     |     |     |     | N             | Y   | Y   | N   | N   |
| Vaughan (2018)              |                        |     |     |     |     |                             |     |     |     |     | Y                        | Y   | Y   | N   | Y   |               |     |     |     |     |

*Note.* MMAT = Mixed Methods Appraisal Tool; Y = Criteria satisfied; N = Criteria not satisfied. A column for quantitative, randomized controlled trial studies was not included, as no randomized controlled trial studies were reviewed.

- 1.1. Is the qualitative approach appropriate to answer the research question?
- 1.2. Are the qualitative data collection methods adequate to address the research question?
- 1.3. Are the findings adequately derived from the data?
- 1.4. Is the interpretation of results sufficiently substantiated by data?
- 1.5. Is there coherence between qualitative data sources, collection, analysis and interpretation?
- 3.1. Are the participants representative of the target population?
- 3.2. Are measurements appropriate regarding both the outcome and exposure/intervention?
- 3.3. Are there complete outcome data?
- 3.4. Are the confounders accounted for in the design and analysis?
- 3.5. During the study period, is the intervention/exposure administered as intended?
- 4.1. Is the sampling strategy relevant to address the research question?
- 4.2. Is the sample representative of the target population?
- 4.3. Are the measurements appropriate?
- 4.4. Is the risk of nonresponse bias low?
- 4.5. Is the statistical analysis appropriate to answer the research question?
- 5.1. Is there an adequate rationale for using a mixed methods design to address the research question?
- 5.2. Are the different components of the study effectively integrated to answer the research question?
- 5.3. Are the results adequately brought together into overall interpretations?
- 5.4. Are divergences and inconsistencies between quantitative and qualitative results adequately addressed?
- 5.5. Do the different components of the study adhere to the quality criteria of each tradition of the methods involved?

## References

- An, S., Feng, X., Dai, Y., Bo, H., Wang, X., Li, M., Woo, J. Z., Liang, X., Guo, C., Liu, C. X., & Wei, L. (2017). Development and evaluation of a speech-generating AAC mobile app for minimally verbal children with autism spectrum disorder in mainland China. *Molecular Autism*, 8(1), 52. <https://doi.org/10.1186/s13229-017-0165-5>
- Andres, P. (2006). Developing an appropriate icon set for a Mandarin Chinese augmentative communication system. *International Journal of Computer Processing of Oriental Languages*, 19(4), 275–283. <https://doi.org/10.1142/S0219427906001499>
- Baldassarri, S., Rubio, J. M., Azpiroz, M. G., & Cerezo, E. (2014). AraBoard: A multiplatform alternative and augmentative communication tool. *Procedia Computer Science*, 27, 197–206. <https://doi.org/10.1016/j.procs.2014.02.023>

- Benkherraf, M. (2019). Digital exchange communication system for children and youths with autism. In K. Arai, S. Kapoor, & R. Bhatia (Eds.), *Intelligent systems and applications* (Vol. 869, pp. 487–495). Springer International Publishing. [https://doi.org/10.1007/978-3-030-01057-7\\_39](https://doi.org/10.1007/978-3-030-01057-7_39)
- Bhattacharya, S., & Basu, A. (2009). Design of an iconic communication aid for individuals in India with speech and motion impairments. *Assistive Technology*, 21(4), 173–187. <https://doi.org/10.1080/10400430903246035>
- Bhattacharya, S., & Basu, A. (2010). Design of a word to sentence generator for augmentative communication. *International Journal of Computers and Applications*, 32(1), 73–83. <https://doi.org/10.2316/Journal.202.2010.1.202-2547>
- Blomberg, M., Carlson, R., Elenius, K., Galyas, K., Granstrom, B., Hunnicutt, S., & Neovius, L. (1986). Speech synthesis and recognition in technical aids. *Speech Transmission Laboratory Quarterly Progress and Status Report*, 4, 45–56.
- Choi, S., Lee, H., & Hong, K.-H. (2012). The Korean web-based AAC board making system. *Lecture Notes in Computer Science*, 7383(2), 275–278. [https://doi.org/10.1007/978-3-642-31534-3\\_42](https://doi.org/10.1007/978-3-642-31534-3_42)
- Daems, J., Bosch, N., Solberg, S., Dekelver, J., & Kultsova, M. (2016). AbleChat: Development of a chat app with pictograms for people with intellectual disabilities. In *Engineering for society 2016: Raising awareness for the societal role of engineering* (pp. 25–32).
- García-Méndez, S., Fernandez-Gavilanes, M., Costa-Montenegro, E., Juncal-Martinez, J., Gonzalez-Castano, F. J., & Reiter, E. (2019). A system for automatic English text expansion. *IEEE Access*, 7, 123320–123333. <https://doi.org/10.1109/ACCESS.2019.2937505>
- Heikkilä, L., Heinonen, J., & Kaihua, J. (2019). *Alternative communication in physiotherapy: Pictures as a communication aid* [Bachelor of Physiotherapy]. Metropolia University of Applied Sciences.
- Hervás, R., Bautista, S., Méndez, G., Galván, P., & Gervás, P. (2020). Predictive composition of pictogram messages for users with autism. *Journal of Ambient Intelligence and Humanized Computing*, 11(11), 5649–5664. <https://doi.org/10.1007/s12652-020-01925-z>
- Huertás, J. L., & Nohama, P. (2014). Speaker: Speech assistance application based on android technology. *XXIV Brazilian Congress of Biomedical Engineering*, 2821–2824.
- Hunnicutt, S. (1984). Bliss symbol-to-speech conversion: "Blisstalk." *Speech Transmission Laboratory Quarterly Progress and Status Report*, 1, 58–77.
- Iida, A., & Campbell, N. (2003). Speech database design for a concatenative text-to-speech synthesis system for individuals with communication disorders. *International Journal of Speech Technology*, 6(4), 379–392. <https://doi.org/10.1023/A:1025761017833>
- Johnson, M. J., Evans, D. G., Mohamed, Z., & Caress, A.-L. (2006). The development and evaluation of alternative communication strategies to facilitate interactions with Somali refugees in primary care: A preliminary study. *Informatics in Primary Care*, 14(3), 183–189. <https://doi.org/10.14236/jhi.v14i3.629>
- Lundälv, M., Derbring, S., Mühlenbock, K. H., Brännström, A., Farre, B., & Nordberg, L. (2014). Inclusive AAC: Multi-modal and multilingual language support for all. *Technology and Disability*, 26(2/3), 93–103. <https://doi.org/10.3233/TAD-140407>
- Mertl, J., & Frič, V. (2019). Key-to-voice app: A simple speech-generating device suitable (not only) for a hospital environment. *Technology and Disability*, 31(4), 169–181. <https://doi.org/10.3233/TAD-180199>

- Nakazono, K., Kakuta, M., Nagashima, Y., & Hosono, N. (2010). Development of universal communication aid and its design concept—For use by hearing-impaired people and foreign travelers. *NTT Technical Review*, 8(7).
- Vaillant, P. (1998). Interpretation of iconic utterances based on contents representation: Semantic analysis in the PVI system. *Natural Language Engineering*, 4(1), 17–40. <https://doi.org/10.1017/S1351324997001836>
- Vaughan, L. (2018). *The development, implementation and maintenance of augmentative and alternative communication through telepractice in Peru* [Master of Arts]. University of Kansas.
