# Supplementary material
Source: publisher figshare collection journal article supplement (https://asha.figshare.com/articles/dataset/_/21482607)
Supplement: Supplementary file 2 [file 1]

**Supplemental Material S1.** String search terms for EBSCOHost databases (Academic Search Premier, CINAHL Plus with Full Text, Communication and Mass Media Complete, ERIC, and PsycInfo).

([Indigenous OR "First Nations" OR "native peoples" OR Aboriginal OR "Torres Strait Islander" OR Maori OR Indian OR cultur\* OR linguistic\* OR ethnic\* OR divers\* OR minority OR bilingual\* OR multilingual\* OR International\* OR "other than English" OR Dutch OR French OR Spanish OR Zulu OR Setswana OR Korean OR Mandarin OR Chinese OR Vietnam\* OR Urdu OR Hindi OR Malay\* OR Thai OR Catalan OR African OR Mexican OR Japanese OR Arab\* OR Palestinian OR Afrikaans OR Somali OR Peru OR India OR China OR Pakistan OR "South Africa" OR Kenya OR "Sri Lanka" OR Israel OR Ghana OR Polish OR Turkish] AND [design\* OR develop\* OR build\* OR construct \* OR creat\* OR identify\* OR determin\* OR generat\*] AND ["Augmentative and Alternative Communication" OR "Alternative and Augmentative Communication" OR "augmentative communication" OR "alternative communication" OR AAC OR "aided communication" OR "aided language" OR "voice synthesis" OR "voice banking" OR "core vocabulary" OR "speech generating device" OR "voice output communication" OR "communication device" OR "communication aid" OR "communication board" OR "communication book" OR "communication chart" OR "language board" OR "choice board" OR "picture communication" OR "graphic symbol"]]).
